# Supplementary material for: Exploring the selectivity of cytochrome P450 for enhanced novel anticancer agent synthesis
Source: Royal Society of Chemistry journal article supplement (doi:10.1039/d4fd00004h), 2024-01-01
Supplement: d4fd00004h1.pdf [file d4fd00004h1.pdf]

# *Supporting Information for:* Exploring the Selectivity of Cytochrome P450 for Enhanced Novel Anticancer Agent Synthesis

Janko Čivić <sup>[a]</sup>, Neil R. McFarlane <sup>[a]</sup>, Joleen Masschelein <sup>[b]</sup>, Jeremy N. Harvey <sup>[a]</sup>

[a] Janko Čivić, Neil R. McFarlane, Prof. Jeremy N. Harvey  
Department of Chemistry  
KU Leuven  
B-3001 Leuven Celestijnenlaan 200f- box 2404, Belgium  
**E-Mail:** janko.civic@kuleuven.be  
**E-Mail:** neilrory.mcfarlane@kuleuven.be  
**E-Mail:** jeremy.harvey@kuleuven.be

[b] Joleen Masschelein  
Department of Biology  
KU Leuven  
B-3001 Leuven Kasteelpark Arenberg 31 - box 2438, Belgium  
**E-Mail:** joleen.masschelein@kuleuven.be

**Table S1:** Summary of BLAST sequence alignment results against the sequence of OxiK with the Protein Data Bank, where the first row contains the relevant data for OxiK. In order, the columns are the organism where the sequence comes from, the UniProt accession code, the Protein Data Bank accession code, the BLAST score calculated against OxiK, the percentage identity as compared to OxiK, the RMSD of the Protein Data Bank 3D

| Organism                                          | UniProt Code | pdb id | BLAST Score | Per. Identity | RMSD (Å) | Apo/Holo | Notes                                                                                     | Reference |
|---------------------------------------------------|--------------|--------|-------------|---------------|----------|----------|-------------------------------------------------------------------------------------------|-----------|
| <b>(OxiK) Pseudomonas baetica</b>                 | A0A2N0DV48   | -      | -           | -             | -        | Apo      | -                                                                                         | -         |
| <b>Streptomyces avermitilis</b>                   | Q82D73       | 7WZL   | 85.9        | 24.263        | 1.857    | Apo      | -                                                                                         | 1         |
| <b>Deinococcus aerius</b>                         | A0A2I9DQ46   | 7F3H   | 75.9        | 22.65         | 1.742    | Apo      | -                                                                                         | 2         |
| <b>Priestia megaterium</b>                        | P14779       | 7WG0   | 75.9        | 21.649        | 2.645    | Holo     | Complex with N-palmitoyl-L-phenylalanine bound, Manganese Protoporphyrin IX-Reconstituted | 3         |
| <b>Priestia megaterium</b>                        | P14779       | 4RSN   | 74.7        | 22.099        | 2.995    | Apo      | E267V mutant                                                                              | 4         |
| <b>Priestia megaterium</b>                        | P14779       | 3HF2   | 74.3        | 22.099        | 1.807    | Apo      | I401P mutant                                                                              | 5         |
| <b>Deinococcus apachensis</b>                     | N/R          | 7F3W   | 71.6        | 22.436        | 1.695    | Apo      | N190F/V356L/A486E mutant                                                                  | 6         |
| <b>Arabidopsis thaliana</b>                       | O64989       | 6A15   | 68.6        | 26.54         | 2.827    | Holo     | Complex with cholesterol                                                                  | 7         |
| <b>Arabidopsis thaliana</b>                       | O64989       | 6A16   | 68.2        | 27.014        | 1.788    | Holo     | Complex with uniconazole                                                                  | 7         |
| <b>Arabidopsis thaliana</b>                       | O64989       | 6A17   | 67.8        | 25.926        | 1.582    | Holo     | Complex with brassinazole                                                                 | 7         |
| <b>Peribacillus butanolivorans</b>                | Q06069       | 5XNT   | 63.2        | 24.576        | 5.433    | Apo      | -                                                                                         | 8         |
| <b>Priestia megaterium</b>                        | Q06069       | 4YT3   | 62.8        | 25.07         | 4.946    | Apo      | -                                                                                         | 9         |
| <b>Sorghum bicolor</b>                            | Q94IP1       | 6VBY   | 60.1        | 23.11         | 3.067    | Holo     | Complex with cinnamic acid                                                                | 10        |
| <b>Nocardia farcinica IFM 10152</b>               | Q5YNS8       | 4J6B   | 55.8        | 23.615        | 4.946    | Holo     | Complex with pregnenolone                                                                 | 11        |
| <b>Nocardia farcinica IFM 10152</b>               | Q5YNS8       | 6TO2   | 55.8        | 23.615        | 5.433    | Holo     | Complex with 5alpha-Androstan-3-one                                                       | 12        |
| <b>Priestia megaterium DSM 319</b>                | D5DF88       | 5OFQ   | 51.6        | 23.227        | 3.067    | Apo      | -                                                                                         | 13        |
| <b>Naegleria fowleri</b>                          | A0A2H4A2U9   | 6AY6   | 49.7        | 21.591        | 3.701    | Holo     | Complex with voriconazole                                                                 | 14        |
| <b>Bacillus sp. (in: firmicutes)</b>              | E5WPM6       | 8HG9   | 49.3        | 24.017        | 3.403    | Apo      | -                                                                                         | 15        |
| <b>Naegleria fowleri</b>                          | A0A2H4A2U9   | 6AY4   | 49.3        | 21.591        | 3.725    | Holo     | Complex with fluconazole                                                                  | 14        |
| <b>Naegleria fowleri</b>                          | A0A2H4A2U9   | 5TL8   | 48.9        | 21.591        | 3.777    | Holo     | Complex with posaconazole                                                                 | 16        |
| <b>Medicago truncatula</b>                        | A0A072UMR6   | 8E83   | 48.9        | 20.041        | 2.736    | Apo      | -                                                                                         | 17        |
| <b>Streptomyces violaceoruber</b>                 | A0A1V0UEC8   | 6A7J   | 45.4        | 26.263        | 3.006    | Holo     | Complex with testosterone                                                                 | 18        |
| <b>Bacillus subtilis subsp. subtilis str. 168</b> | O31785       | 4YZR   | 43.9        | 24.312        | 7.533    | Apo      | Also from a polyketide synthase cluster                                                   | 19        |
| <b>Streptomyces sp. JS01</b>                      | A0A087KD84   | 6A7I   | 42.7        | 25.253        | 10.353   | Apo      | -                                                                                         | 18        |
| <b>Priestia megaterium DSM 319</b>                | D5DF35       | 7Q9E   | 42.7        | 21.963        | 4.335    | Apo      | -                                                                                         | 20        |

structure against AlphaFold entry A0A2N0DV48 as calculated in PyMOL, whether the structure is apo or holo, any additional notes, and the relevant reference.

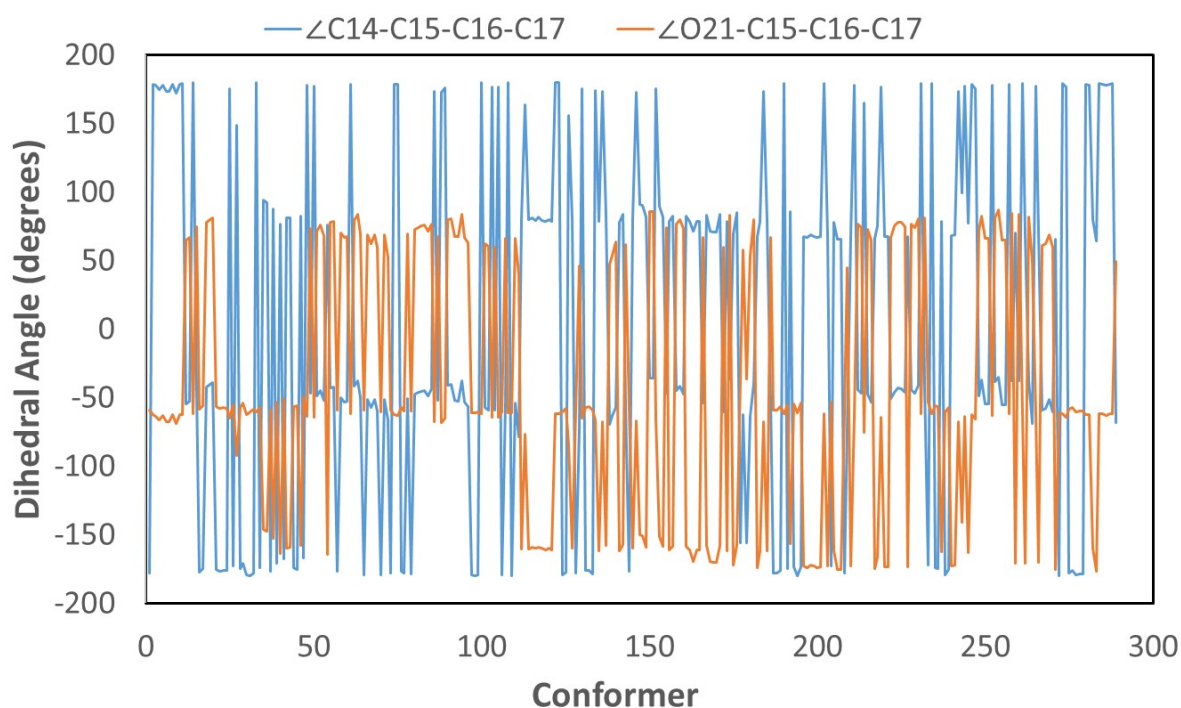

**Figure S1:** Plot of two dihedral angles,  $\angle\text{C14-C15-C16-C17}$  and  $\angle\text{O21-C15-C16-C17}$ , of all conformers found in the conformational search. Dihedral angles are given in degrees for easier interpretation.

| Run | Calculation type             | Restrains<br>(kcal/mol $\text{\AA}^2$ ) | Constant | Minimization steps /<br>Simulation time | Shake | Timestep (fs) |
|-----|------------------------------|-----------------------------------------|----------|-----------------------------------------|-------|---------------|
| 1   | minimization (CPU)           | non-solvent 200                         | V        | 10 000 steps                            | No    | -             |
| 2   | minimization (CPU)           | -                                       | V        | 10 000 steps                            | No    | -             |
| 3   | heating (CPU) 0-300 K        | non-solvent 10                          | V        | 20 ps                                   | Yes   | 2             |
| 4   | pressure equilibration (CPU) | non-solvent 10                          | P        | 10 ps                                   | Yes   | 2             |
| 5   | pressure equilibration (GPU) | non-solvent 10                          | P        | 1 ns                                    | Yes   | 2             |
| 6   | equilibration (GPU)          | substrate 5                             | V        | 1 ns                                    | Yes   | 2             |
| 7   | equilibration (GPU)          | substrate 5                             | V        | 1 ns                                    | Yes   | 2             |
| 8   | equilibration (GPU)          | -                                       | V        | 1 ns                                    | Yes   | 2             |
| 9   | production (GPU)             | -                                       | V        | 100 ns                                  | Yes   | 2             |

**Table S2:** MD simulations protocol.

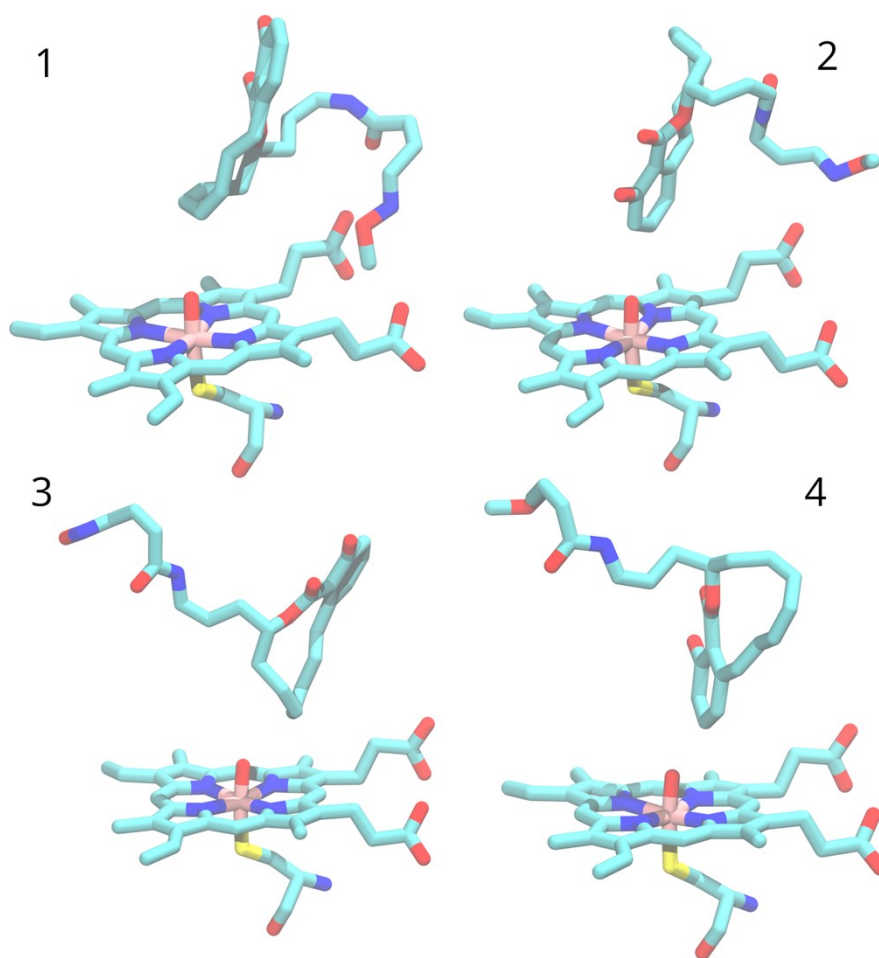

**Figure S2:** Starting poses selected for molecular dynamics simulations. Colours: cyan, carbon; red, oxygen; blue, nitrogen; yellow, sulphur; pink, iron; white, hydrogen.

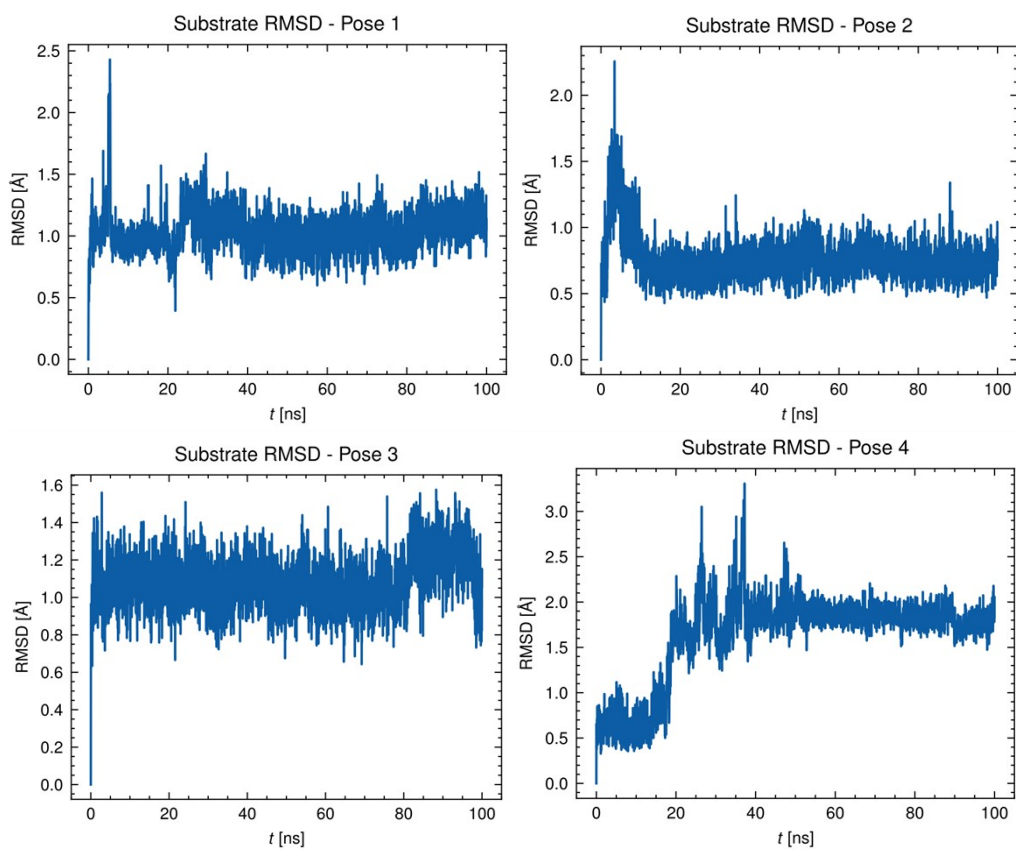

**Figure S3:** RMSD of the oximidine substrate during the 100 ns MD simulations in different poses.

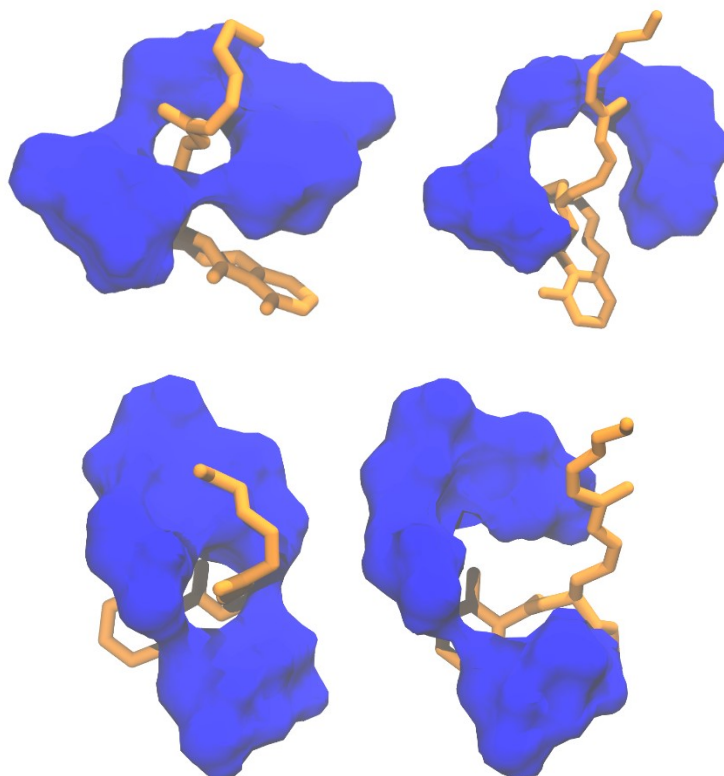

**Figure S4:** Shape of the channel entrance after docking (left) and after MD simulations (right) of pose 3 (top) and pose 4 (bottom). The entrance forming residues Gly272, Leu268, Thr443, and Ser444 are shown as a blue surface. The substrate is represented as sticks in orange.

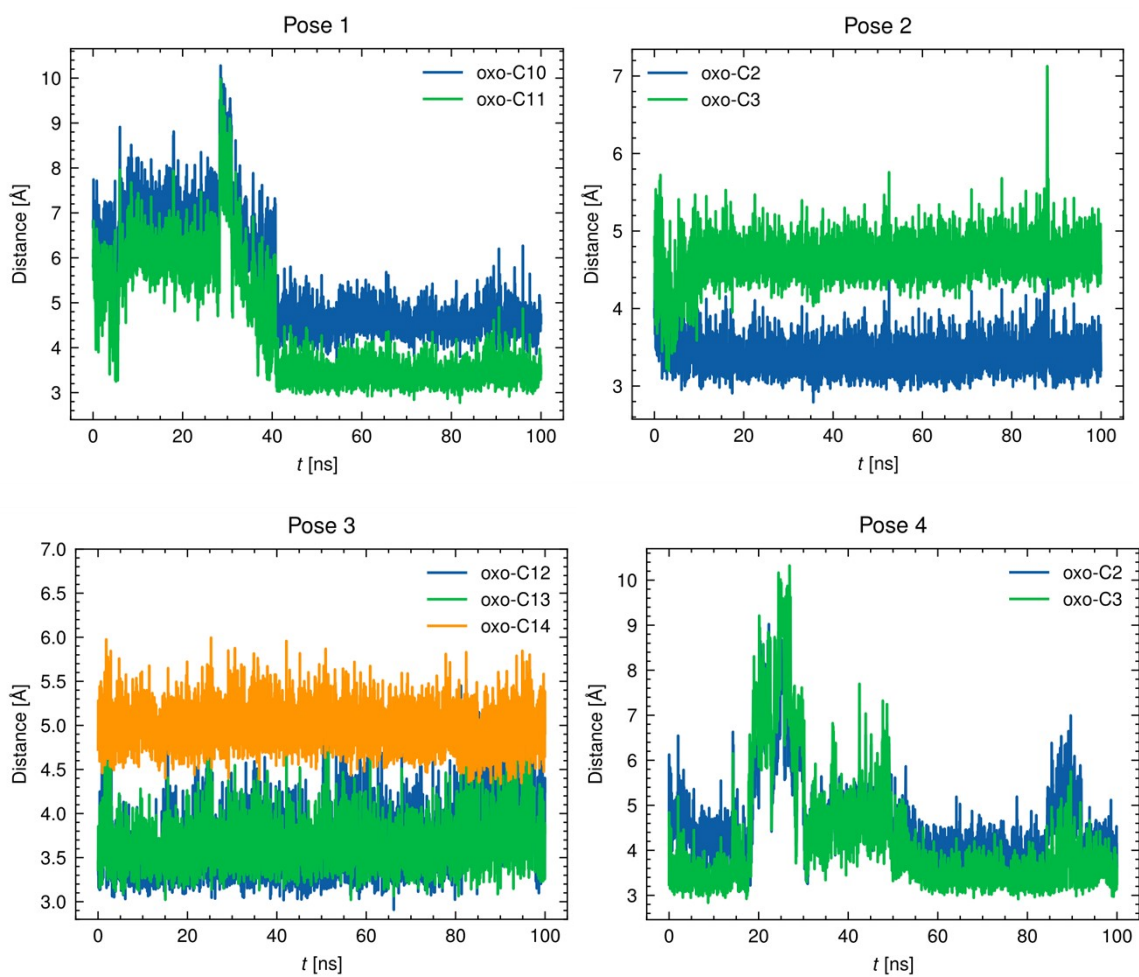

**Figure S5:** Some distances discussed in the main text, during the 100 ns MD simulations of the substrate in different poses.

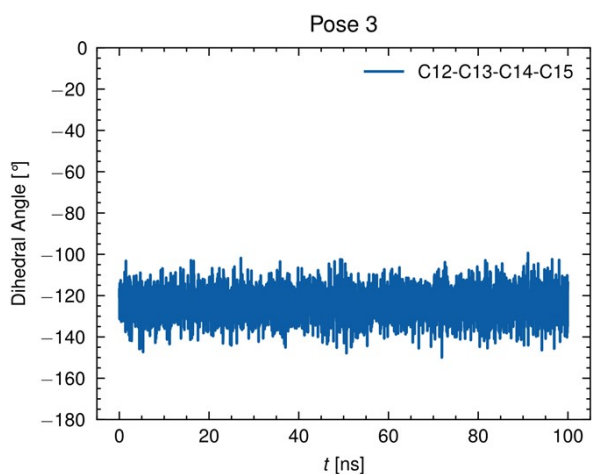

**Figure S6:** Value of the C12-C13-C14-C15 dihedral angle of the substrate during the 100 ns MD simulation in pose 3.

## References

- (1) Kim, V. C.; Kim, D. G.; Lee, S. G.; Lee, G. H.; Lee, S. A.; Kang, L. W. Crystal Structure of Cytochrome P450 184A1 from *Streptomyces Avermitilis*. **2023**.
- (2) Wan, N.-W.; Cui, H.-B.; Zhao, L.; Shan, J.; Chen, K.; Wang, Z.-Q.; Zhou, X.-J.; Cui, B.-D.; Han, W.-Y.; Chen, Y.-Z. Directed Evolution of Cytochrome P450DA Hydroxylase Activity for Stereoselective Biohydroxylation. *Catal. Sci. Technol.* **2022**, *12* (18), 5703–5708. <https://doi.org/10.1039/D2CY00164K>.
- (3) Keita, O.; Osami, S.; Yuichiro, A.; Hiroshi, S. Structure of the Manganese Protoporphyrin IX-Reconstituted CYP102A1 Heme Domain with N-Palmitoyl-L-Phenylalanine. **2023**.
- (4) Ren, X. K.; Yorke, J. A.; Taylor, A.; Zhang, A. L.; Zhang, T.; Zhou, W. H.; Wong, L. -L. Expanding the Drug Metabolism Function of P450BM3. **2015**.
- (5) Whitehouse, C. J. C.; Bell, S. G.; Yang, W.; Yorke, J. A.; Blanford, C. F.; Strong, A. J. F.; Morse, E. J.; Bartlam, M.; Rao, Z.; Wong, L.-L. A Highly Active Single-Mutation Variant of P450BM3 (CYP102A1). *ChemBioChem* **2009**, *10* (10), 1654–1656. <https://doi.org/10.1002/cbic.200900279>.
- (6) Wan, N. W. Crystal Structure of Cytochrome P450DA Mutant (N190F/V356L/A486E) Heme Domain. **2021**.
- (7) Fujiyama, K.; Hino, T.; Kanadani, M.; Watanabe, B.; Jae Lee, H.; Mizutani, M.; Nagano, S. Structural Insights into a Key Step of Brassinosteroid Biosynthesis and Its Inhibition. *Nat. Plants* **2019**, *5* (6), 589–594. <https://doi.org/10.1038/s41477-019-0436-6>.
- (8) Kim, K.-H.; Lee, C. W.; Dangi, B.; Park, S.-H.; Park, H.; Oh, T.-J.; Lee, J. H. Crystal Structure and Functional Characterization of a Cytochrome P450 (BaCYP106A2) from *Bacillus* Sp. PAMC 23377. **2017**, *27* (8), 1472–1482. <https://doi.org/10.4014/jmb.1706.06013>.
- (9) Janocha, S.; Carius, Y.; Hutter, M.; Lancaster, C. R. D.; Bernhardt, R. Crystal Structure of CYP106A2 in Substrate-Free and Substrate-Bound Form. *ChemBioChem* **2016**, *17* (9), 852–860. <https://doi.org/10.1002/cbic.201500524>.
- (10) Zhang, B.; Lewis, K. M.; Abril, A.; Davydov, D. R.; Vermerris, W.; Sattler, S. E.; Kang, C. Structure and Function of the Cytochrome P450 Monooxygenase Cinnamate 4-Hydroxylase from *Sorghum Bicolor* 1. *Plant Physiol.* **2020**, *183* (3), 957–973. <https://doi.org/10.1104/pp.20.00406>.
- (11) Herzog, K.; Bracco, P.; Onoda, A.; Hayashi, T.; Hoffmann, K.; Schallmeyer, A. Enzyme–Substrate Complex Structures of CYP154C5 Shed Light on Its Mode of Highly Selective Steroid Hydroxylation. *Acta Crystallogr. D Biol. Crystallogr.* **2014**, *70* (11), 2875–2889. <https://doi.org/10.1107/S1399004714019129>.
- (12) Bracco, P.; Wijma, H. J.; Nicolai, B.; Buitrago, J. A. R.; Klünemann, T.; Vila, A.; Schrepfer, P.; Blankenfeldt, W.; Janssen, D. B.; Schallmeyer, A. CYP154C5 Regioselectivity in Steroid Hydroxylation Explored by Substrate Modifications and Protein Engineering\*\*. *ChemBioChem* **2021**, *22* (6), 1099–1110. <https://doi.org/10.1002/cbic.202000735>.
- (13) Abdulmughni, A.; Jóźwik, I. K.; Brill, E.; Hannemann, F.; Thunnissen, A.-M. W. H.; Bernhardt, R. Biochemical and Structural Characterization of CYP109A2, a Vitamin D3 25-Hydroxylase from *Bacillus Megaterium*. *FEBS J.* **2017**, *284* (22), 3881–3894. <https://doi.org/10.1111/febs.14276>.
- (14) Debnath, A.; Calvet, C. M.; Jennings, G.; Zhou, W.; Aksenov, A.; Luth, M. R.; Abagyan, R.; Nes, W. D.; McKerrow, J. H.; Podust, L. M. CYP51 Is an Essential Drug Target for the Treatment of Primary Amoebic Meningoencephalitis (PAM). *PLoS Negl. Trop. Dis.* **2017**, *11* (12), e0006104. <https://doi.org/10.1371/journal.pntd.0006104>.
- (15) Kim, K.-H.; Do, H.; Lee, C. W.; Subedi, P.; Choi, M.; Nam, Y.; Lee, J. H.; Oh, T.-J. Crystal Structure and Biochemical Analysis of a Cytochrome P450 Steroid Hydroxylase (BaCYP106A6) from *Bacillus* Species. **2023**, *33* (3), 387–397. <https://doi.org/10.4014/jmb.2211.11031>.
- (16) Podust, L. M.; Jennings, G.; Calvet-Alvarez, C.; Debnath, A. Structure of the *Naegleria Fowleri* CYP51 at 1.7 Angstroms Resolution. **2017**.

- (17) Wang, X.; Pan, H.; Sagurthi, S.; Paris, V.; Zhuo, C.; Dixon, R. A. The Protein Conformational Basis of Isoflavone Biosynthesis. *Commun. Biol.* **2022**, *5* (1), 1–10. <https://doi.org/10.1038/s42003-022-04222-x>.
- (18) Dangi, B.; Lee, C. W.; Kim, K.-H.; Park, S.-H.; Yu, E.-J.; Jeong, C.-S.; Park, H.; Lee, J. H.; Oh, T.-J. Characterization of Two Steroid Hydroxylases from Different *Streptomyces* Spp. and Their Ligand-Bound and -Unbound Crystal Structures. *FEBS J.* **2019**, *286* (9), 1683–1699. <https://doi.org/10.1111/febs.14729>.
- (19) Race, P. R.; Zulkepli, A. Z.; Anderson, R. J. L. *Bacillus Subtilis* 168 Bacillaene Polyketide Synthase (PKS) Cytochrome P450 PksS. **2016**.
- (20) Carius, Y.; Hutter, M.; Kiss, F.; Bernhardt, R.; Lancaster, C. R. D. Structural Comparison of the Cytochrome P450 Enzymes CYP106A1 and CYP106A2 Provides Insight into Their Differences in Steroid Conversion. *FEBS Lett.* **2022**, *596* (24), 3133–3144. <https://doi.org/10.1002/1873-3468.14502>.
